1                   **Hexameric helicase G40P unwinds DNA in single base pair steps**

2

3

4                   Michael Schlierf<sup>1,4\*</sup>, Ganggang Wang<sup>2</sup>, Xiaojiang S. Chen<sup>2</sup> and Taekjip Ha<sup>1,3,5\*</sup>

5

6                   <sup>1</sup> Physics Department and Center for the Physics of Living Cells, University of Illinois at  
7 Urbana-Champaign, Urbana, Illinois, USA

8                   <sup>2</sup> Molecular and Computational Biology, Department of Biological Sciences, University  
9 of Southern California, Los Angeles, California, USA

10                   <sup>3</sup> Howard Hughes Medical Institute, Baltimore, MD 21205, USA

11                   <sup>4</sup> B CUBE – Center for Molecular Bioengineering, TU Dresden, Dresden, Germany

12                   <sup>5</sup> Department of Biophysics and Biophysical Chemistry, Department of Biophysics and  
13 Department of Biomedical Engineering, Johns Hopkins University, Baltimore, MD  
14 21205, USA

15

16

17                   \* corresponding authors:       Michael Schlierf       michael.schlierf@tu-dresden.de

18                                           Taekjip Ha           tjha@jhu.edu

19

20

## 1 **Abstract**

2 Most replicative helicases are hexameric, ring-shaped motor proteins that  
3 translocate on and unwind DNA. Despite extensive biochemical and structural  
4 investigations, how their translocation activity is utilized chemo-mechanically in DNA  
5 unwinding is poorly understood. We examined DNA unwinding by G40P, a DnaB-family  
6 helicase, using a single-molecule fluorescence assay with a single base pair resolution. The  
7 high-resolution assay revealed that G40P by itself is a very weak helicase that stalls at  
8 barriers as small as a single GC base pair and unwinds DNA with the step size of a single  
9 base pair. Single ATP $\gamma$ S binding could stall unwinding, demonstrating highly coordinated  
10 ATP hydrolysis between the six identical subunits. We observed frequent slippage of the  
11 helicase, which is fully suppressed by the primase DnaG. We anticipate that these findings  
12 allow a better understanding on the fine balance of thermal fluctuation activation and  
13 energy derived from hydrolysis.

14

## 15 **Introduction**

16 Helicases are essential enzymes for all life forms and catalyze the separation of  
17 double-stranded nucleic acids (dsNA) into single-stranded nucleic acids (ssNA), and many  
18 of these enzymes involved in DNA repair, DNA recombination and transcription  
19 termination are linked to human diseases (Crampton et al., 2006; Enemark and Joshua-Tor,  
20 2008, 2006; Gai et al., 2004; Johnson et al., 2007; Lionnet et al., 2007; Lohman et al., 2008;  
21 Manosas et al., 2009; Pandey et al., 2009; Patel and Picha, 2000; Rasnik et al., 2006b;  
22 Ribeck et al., 2010; Rothenberg et al., 2007; Singleton et al., 2000; Thomsen and Berger,  
23 2009; Wang et al., 2008; Yodh et al., 2010). Helicases are categorized into different  
24 superfamilies (SF) by protein sequence motifs, polarity of translocation and function  
25 among other criteria (Berger, 2008). Non-hexameric helicases with a pair of RecA-like  
26 domains are members of SF I and SF II, and are involved in DNA maintenance including  
27 repair, Holliday junction migration, chromatin remodeling, RNA melting and RNA-  
28 binding protein displacement. Hexameric or dodecameric helicases are classified into SF  
29 III-VI and are key players in DNA replication and transcription termination. SF III and SF  
30 VI helicases share a common fold called the AAA+ fold and members of the SF IV and V  
31 share the RecA-like fold. Both folds are structurally members of the ASCE (additional

1 strand conserved E) superfamily of enzymes that consists of various multimeric enzymes  
2 with extremely diverse function (Erzberger and Berger, 2006).

3 Forward translocation of ring-shaped helicases on nucleic acids lattice is promoted  
4 by ATP hydrolysis. Based on crystal structures, two distinct models have been proposed  
5 concerning how the hydrolysis of ATP molecules in the multi-subunit enzyme is  
6 coordinated between the subunits: a sequential, ‘staircase-like’ model for ATP hydrolysis  
7 and a concerted ATP hydrolysis model. The staircase model based on the structures of  
8 BPV E1 helicase bound to ssDNA and *E. coli* Rho helicase bound to ssRNA (Enemark and  
9 Joshua-Tor, 2006; Thomsen and Berger, 2009) entails sequential hydrolysis of ATP around  
10 the hexameric ring, and one nt translocation for every ATP hydrolyzed. By extension, the  
11 unwinding step size has been proposed to be 1 base pair (bp) but this has not been  
12 experimentally tested. The concerted hydrolysis model based on the all-or-nothing  
13 nucleotide occupancy of SV40 Large T antigen structures (Gai et al., 2004) posits that the  
14 six ATP binding sites fire simultaneously, moving on the DNA by an increment determined  
15 by the stroke size of the DNA binding motif, which can be larger than 1 nt or 1 bp. For T7  
16 gp4 helicase-primase, structural and ensemble kinetic data (Crampton et al., 2006; Liao et  
17 al., 2005; Singleton et al., 2000) suggested a sequential hydrolysis mechanism during DNA  
18 translocation, but the estimated unwinding step size is either larger than 1 bp (Johnson et  
19 al., 2007) or is variable depending on the GC content of the duplex DNA (Donmez and  
20 Patel, 2008; Syed et al., 2014). For the Rho helicase proposed to move in 1 nt steps  
21 (Thomsen and Berger, 2009), chemical interference data suggest that Rho needs to reset  
22 itself after it unwinds about ~7 bp (Schwartz et al., 2009). For DnaB, ensemble kinetic  
23 studies supported a sequential ATP hydrolysis mechanism (Roychowdhury et al., 2009)  
24 with an unwinding step size of 1 bp (Galletto et al., 2004), but DnaB structure bound to  
25 ssDNA showed that one subunit of DnaB hexamer binds two nucleotides, leading to the  
26 proposal that DnaB unwinds DNA in two base pair steps (Itsathitphaisarn et al., 2012).  
27 Conflicting data and models call for experiments with sufficient spatio-temporal resolution  
28 to detect the elementary steps of unwinding. In the most comprehensive analysis of  
29 stepping by a ring-shaped motor on DNA, the DNA packaging motor from  $\phi$ 29 was shown  
30 to package dsDNA in a hierarchy of non-integer, 2.5 bp steps, pausing after packaging 10  
31 bp (Moffitt et al., 2009).

1

## 2 **Results and Discussion**

### 3 **G40P unwinds dsDNA in single base pair steps**

4 We probed the helicase activity of the phage SPP1 G40P, a DnaB type hexameric  
5 helicase (Berger, 2008; Pedré et al., 1994; Wang et al., 2008) required for phage replication  
6 in its bacterial host, using an unwinding assay (Ha et al., 2002; Myong et al., 2007; Pandey  
7 et al., 2009; Syed et al., 2014; Yodh et al., 2009) based on single-molecule FRET (Ha et  
8 al., 1996). The substrate is a 40 bp duplex DNA with 3' and 5' single stranded poly-dT  
9 tails, both 31 nt long, to mimic a replication fork, and is immobilized to a polymer-  
10 passivated surface via a biotin-neutravidin linker (Fig. 1a). FRET between the donor (Cy3)  
11 and the acceptor (Cy5) fluorophores conjugated to the fork was used to follow individual  
12 DNA unwinding in real time (Figure 1 – Figure Supplement 1). Duplex unwinding  
13 increases the time-averaged distance between the fluorophores therefore causing a  
14 reduction in FRET, and unwinding completion results in the release of the donor-labeled  
15 strand from the surface and an abrupt disappearance of total fluorescence (Fig. 1b and  
16 Figure 1 – Figure Supplement 1). Initial experiments were carried out using a DNA  
17 substrate with all AT base pairs (40 bp) and typical unwinding trajectories displayed a  
18 smooth and rapid FRET decrease at 1 mM ATP (Fig. 1c). Interestingly, when we repeated  
19 the experiment with a single GC bp inserted in the 11<sup>th</sup> position in otherwise all AT  
20 sequences (Fig. 1a), a large fraction (65 %) of unwinding trajectories showed a stall before  
21 full unwinding, with a characteristic stall lifetime of  $79 \pm 5$  ms (Fig. 1d and Figure 1 –  
22 Figure Supplement 2a). FRET efficiencies of the stalled state were sharply distributed  
23 around  $E_{\text{FRET}} = 0.52 \pm 0.04$  (blue lines in Fig. 1g), indicating that the stall occurs after a  
24 well-defined number of base pairs, presumably ten, have been unwound and is caused by  
25 a single GC base pair.

26 Individual traces revealed helicase slippage events, where partial unwinding is  
27 reverted before another unwinding attempt is made (Fig. 1d, lower panel). The lag time  
28 between successive unwinding attempts is less than 1 s on average, which is about 20-fold  
29 shorter than the *de novo* unwinding initiation time (see Methods and Figure 1 – Figure  
30 Supplement 1d), implying that the same enzyme is responsible for multiple partial  
31 unwinding and slippage events (Ha et al., 2002; Sun et al., 2011). In most slippage events

1 followed by another unwinding attempt, the FRET efficiency returned to its original high  
 2 value of DNA itself, indicating that the helicase slips backwards at least 10 base pairs.

3 DNA with 2 GC bp (11<sup>th</sup> and 12<sup>th</sup> bp) showed stalls at two distinct FRET levels  
 4 ( $E_{\text{FRET}} = 0.53 \pm 0.04$  and  $E_{\text{FRET}} = 0.39 \pm 0.04$ ) determined from Gaussian fitting of  $E_{\text{FRET}}$   
 5 distribution of stalled states (Fig. 1g). Because the first stall occurred at the same FRET  
 6 level as observed with 1 GC bp, we attribute the second stall to the second GC bp. Two  
 7 GC bp reduced full unwinding events to 57% of the traces.

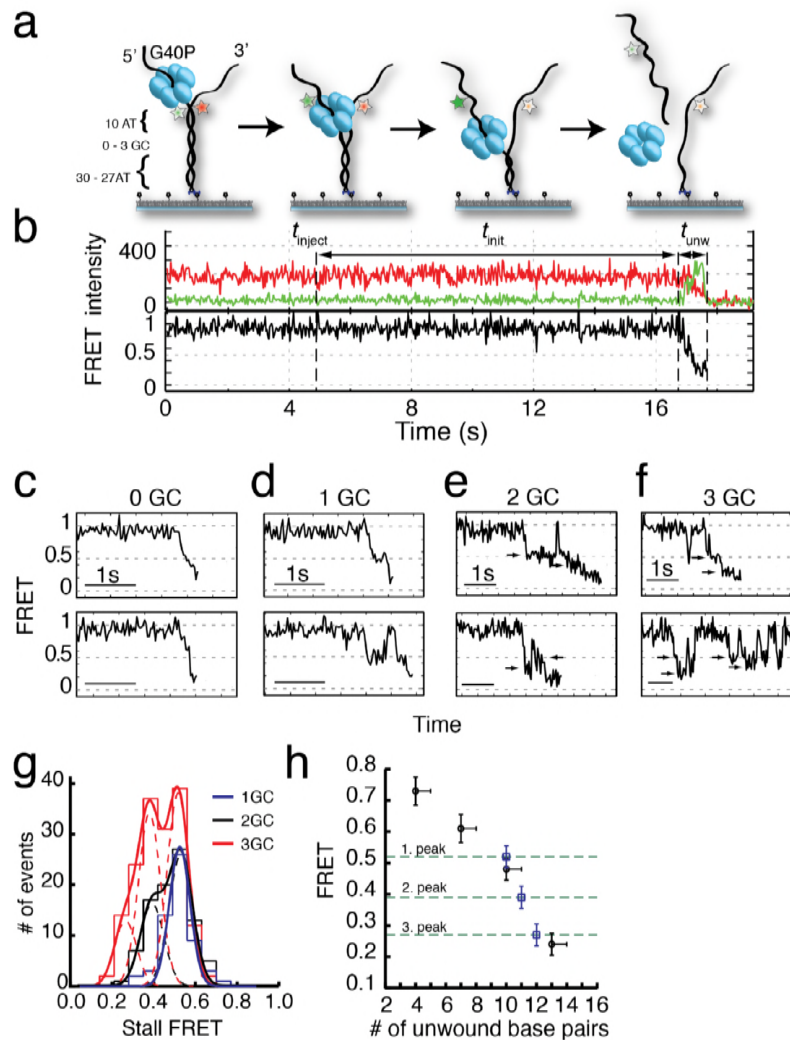

8

9 **Figure 1: G40P unwinds DNA in one base pair steps and slips backwards.** a) Schematic illustration of  
 10 the smFRET unwinding assay. After loading to the substrate G40P unwinds the dsDNA (containing between  
 11 0 and 3 consecutive GC base pairs after 10 AT base pairs) and thereby gradually separates the donor  
 12 fluorophore from the acceptor fluorophore. Complete unwinding results in donor strand leaving from the  
 13 surface. b) Typical unwinding trace of G40P. At  $t_{\text{inject}}$  the protein solution containing Mg.ATP is injected.  
 14 The unwinding initiation time  $t_{\text{init}}$  depends on the protein concentration and is measured from the moment of

1 protein solution injection until unwinding starts. The unwinding time  $t_{\text{unw}}$  is determined from the moment of  
2 FRET efficiency decrease until donor strand leaving. **c)** Typical FRET efficiency unwinding traces of G40P  
3 on an all AT substrate base pair. The scale bar indicates 1 s. **d)** Typical FRET efficiency unwinding traces  
4 of G40P with one GC base pair. The helicase briefly stalls at a characteristic FRET efficiency or slips after  
5 stalling and unwinds in a second attempt. **e)** Typical FRET efficiency unwinding traces of G40P on the  
6 substrate with two consecutive GC base pairs. The helicase stalls eventually at two distinct FRET efficiencies  
7 (see arrows). **f)** Typical FRET efficiency unwinding traces of G40P on the substrate with three consecutive  
8 GC base pairs. The helicase rarely unwinds 3 consecutive GC base pairs completely (top trace). Most traces  
9 show unwinding attempts and stalls at distinct FRET efficiency levels (bottom trace). **g)** FRET efficiency  
10 distribution of stall levels of the one GC (blue), two GC (black) and three GC base pair (red) substrate. A  
11 (multipeak) fit with Gaussians revealed one peak at  $E_{\text{FRET}} = 0.52 \pm 0.04$  for one GC, two peaks at  $E_{\text{FRET}} =$   
12  $0.53 \pm 0.04$  and at  $E_{\text{FRET}} = 0.39 \pm 0.04$  (two dashed lines) for two GC base pairs and three peaks at  $E_{\text{FRET}} =$   
13  $0.52 \pm 0.04$ ,  $E_{\text{FRET}} = 0.38 \pm 0.04$  and at  $E_{\text{FRET}} = 0.27 \pm 0.04$  (three dashed lines) for three GC base pairs. **h)**  
14 Average FRET efficiencies with stalls after 4AT, 7AT, 10AT and 13AT base pairs (black symbols) in  
15 comparison with peak positions of stalls induced by 1GC, 2GC and 3GC base pairs (blue symbols).  
16

17 Complete unwinding trajectories were even more rare (12%) for the DNA with  
18 3 GC bp (11<sup>th</sup>, 12<sup>th</sup> and 13<sup>th</sup> bp). Stalls were identified from all traces, predominantly from  
19 unsuccessful unwinding attempts and are distributed in three distinct FRET levels with two  
20 main peaks centered at  $E_{\text{FRET}} = 0.52 \pm 0.04$  and  $E_{\text{FRET}} = 0.38 \pm 0.04$  and a small peak at  
21  $E_{\text{FRET}} = 0.27 \pm 0.04$  (Fig. 1g). The aforementioned crystallographic structures on ring-  
22 shaped helicases suggest step sizes between one and six nucleotides, resulting from a  
23 staircase like or spring-loaded or concerted ATP hydrolysis model (Enemark and Joshua-  
24 Tor, 2006; Gai et al., 2004; Itsathitphaisarn et al., 2012). Recent experimental studies have  
25 reported for hexameric helicases step sizes from one to three nucleotides depending on the  
26 GC content of the template (Syed et al., 2014). For our experimental design, we introduced  
27 GC barriers at the positions 11, 12 and 13. For a single GC barrier and a ring-shaped  
28 helicase with a step size of one nucleotide, we would expect the barrier-induced stalling at  
29 a single FRET level, corresponding to a helicase at position -1 relative to the GC base pair.  
30 If the helicase would unwind dsDNA with a step size of two nucleotides, and an unknown  
31 starting position on the DNA grid, we would expect to observe 50% of the helicases to stall  
32 at position -2 and 50% at position -1. In this case, we would observe two different FRET  
33 levels for a single GC base pair (Fig. 2a). Introducing a second GC base pair would lead in  
34 the case of a helicase with one nucleotide step size to two possible stalling events, one at



1 position -1 and one at position 1 (Fig. 2b). Again, for a helicase with a step size of two  
2 nucleotides, we would expect two GC base pairs induce stalls at positions -2, -1 and 1 (Fig.  
3 2b). Similarly, we could expect for three consecutive GC base pairs breaks at three  
4 positions for a step size of a single nucleotide and breaks at four positions for a step size of  
5 two nucleotides (Fig. 2c).

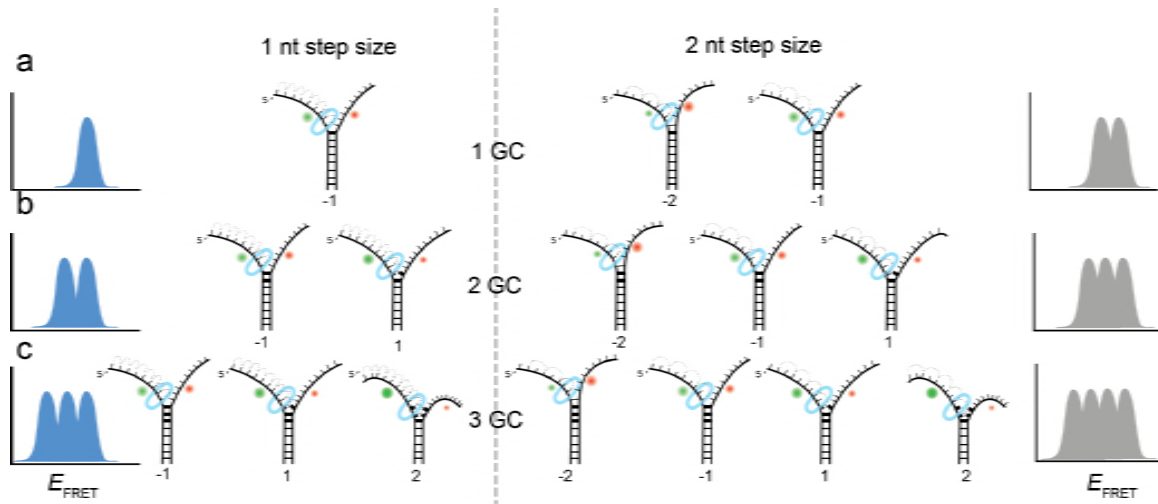

6  
7 **Figure 2: Expected stalling positions induced by GC base pairs.** Stalling sites for 1GC (a), 2GC (b) or  
8 3GC (c) substrate. (left) Assuming a 1 nt step size of G40P, the FRET efficiency distribution of GC induced  
9 breaks would show 1, 2 or 3 peaks for 1, 2 or 3 consecutive GC base pairs. (right) Assuming a 2 nt step size  
10 of G40P, the FRET efficiency distribution of GC induced breaks would show 2, 3 or 4 peaks for 1, 2 or 3  
11 consecutive GC base pairs, due to the phase of the first stepping event. GC base pairs in bold lines, helicase  
12 as blue ring structure. Number below the DNA substrates indicate the breaking position of the helicase  
13 relative to the first GC base pair.

14  
15

16 One, two or three discrete FRET values of stalled states in our data induced by one,  
17 two or three GC base pairs suggest that unwinding occurs in single base pair steps. As a  
18 further test, we obtained a calibration curve between the number of base pairs unwound  
19 and the FRET efficiency by performing the reaction using four different DNA constructs  
20 that have  $m$  AT base pairs followed by  $(40-m)$  GC base pairs ( $m = 4, 7, 10$  and  $13$ ), which  
21 stalls the unwinding reaction presumably at the boundary between AT and GC base pairs  
22 (Fig. 1h). The stall FRET levels from the one, two and three consecutive GC base pairs fall  
23 within error in single base pair steps on our calibration curve (see Methods and Figure 1 –  
24 Figure Supplement 2). Therefore, we conclude that G40P unwinds DNA with a single base  
25 pair step size. Recent optical trap studies of the nonhexameric helicase HCV NS3 and XPD  
26 observed the long anticipated single base pair steps during unwinding (Cheng et al., 2011;

1 Qi et al., 2013). Here, we extend direct observation of single base pair steps during DNA  
2 unwinding to the hexameric helicases.

3 The GC base pair induced pauses of the helicase imply that unwinding depends at  
4 least partially on the thermal fraying of the base pairs due to the higher thermodynamic  
5 stability of GC vs AT base pairs. Raising the experiment temperature increased the  
6 percentage of full unwinding events for the three GC bp construct, i.e. 62 % vs. 12 % at  
7 33 °C vs. 21 °C, respectively (Table S2 and Figure 1 – Figure Supplement 2b).

8

### 9 **Host primase DnaG prevents slippage events**

10 A replicative helicase that cannot easily overcome GC base pairs would be  
11 ineffective. Because DnaG, the host primase, stimulates ATPase and unwinding activities  
12 of DnaB and G40P (Bird et al., 2000; Wang et al., 2008), we tested the effect of DnaG by  
13 forming a complex of G40P with the *Bacillus subtilis* primase DnaG in a ratio of 1:3 (Wang  
14 et al., 2008) before adding the complex to the immobilized DNA to initiate unwinding. Fig.  
15 3a shows typical unwinding traces of the substrate with 3 GC bp in presence of the primase  
16 DnaG. Strikingly, the yield of complete unwinding increased significantly from 12%  
17 without DnaG to 58% with DnaG (Fig. 3b and Table S1). DNA molecules showing full  
18 unwinding did not show any slippage events, suggesting a novel function of DnaG that  
19 stimulates unwinding by preventing slippage. Presence of other replication proteins may  
20 further assist the helicase unwinding activity (Stano et al., 2005).

21 Slippage was also observed using the 40 AT DNA but less frequently (Fig. 3b).  
22 Because T7 gp4, E1 and Rho helicase have higher affinities to ssNA in the nucleotide-  
23 bound state (Adelman et al., 2006; Enemark and Joshua-Tor, 2006; Hingorani and Patel,  
24 1993; Thomsen and Berger, 2009) we hypothesized that slippage would occur more  
25 frequently at lower ATP concentrations. Indeed, at sub-saturating ATP concentrations we  
26 observed a significant increase of slippage events (Fig. 3c) and the number of slippage  
27 events before complete unwinding increased for decreasing ATP concentrations (Fig. 3d).  
28 Inclusion of ADP in the reaction did not reduce or increase the slippage events  
29 significantly, indicating that the enzyme binds tightly to the DNA in both ATP and ADP  
30 bound states. However, presence of DnaG significantly reduced the average number of



- 1 slippage events per full unwinding ( $\approx 2.5$  fold) compared to G40P alone at all tested ATP
- 2 concentrations (Fig. 3d, black triangles and Table S3).

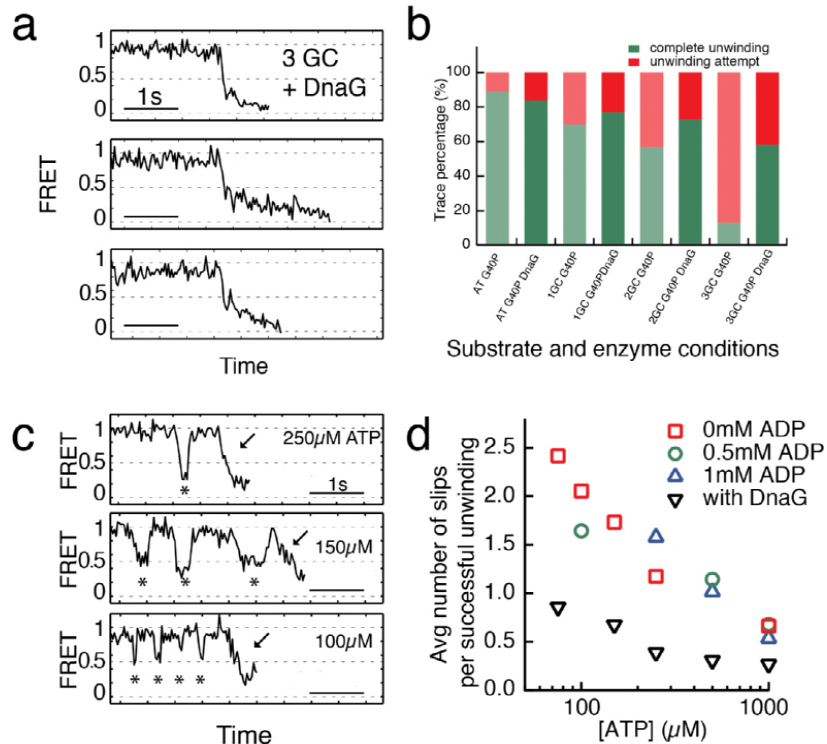

3

4 **Figure 3: Primase DnaG prevents helicase slippage.** **a)** FRET efficiency traces of the G40P-DnaG complex

5 on the 3GC substrate. Traces with successful unwinding showed no slippage events. **b)** Fraction of all traces

6 with protein activity with complete unwinding (green) and just unwinding attempts (red) on different

7 substrates (AT, 1GC, 2GC, 3GC) and at different enzyme conditions (G40P, G40P + DnaG). **c)** FRET

8 efficiency traces with slippage events marked by stars before the actual unwinding events marked by the

9 arrow at [ATP]=250  $\mu$ M, 150  $\mu$ M and 100  $\mu$ M. **d)** Semi-logarithmic plot of the average number of slippage

10 events per total number of unwinding traces at different ATP concentrations. Addition of DnaG reduces the

11 average number of slippage events before successful unwinding by a factor  $\approx 2.5$ .

12

### 13 ATP hydrolysis between the subunits of G40P is highly coordinated

14 G40P slippage can thus be reduced by keeping some nucleotides bound during each

15 translocation step. To elucidate the ATP hydrolysis coordination between subunits, we

16 included ATP $\gamma$ S in the reaction while keeping constant the combined concentration of ATP

17 and ATP $\gamma$ S at 1 mM. ATP $\gamma$ S is a slowly hydrolysable analogue of ATP, and both

18 nucleotides have nearly identical dissociation constants for G40P binding as tested using

19 Mant-ADP (see Methods and Figure 3 – Figure Supplement 1). As expected, the unwinding

1 rate of 40 bp,  $k_{\text{unw}}$ , decreased as the ATP $\gamma$ S concentration increased (Figure 3 – Figure  
2 Supplement 1). Close examination of the unwinding traces with 2.5% ATP $\gamma$ S showed a  
3 pronounced stalling event that was rarely detected without ATP $\gamma$ S (Fig. 4a). The stall  
4 during unwinding was observed at broadly distributed FRET levels (Fig. 4e), suggesting  
5 the stall occurs stochastically, not at a particular location on DNA. At elevated ATP $\gamma$ S ( $\geq$   
6 20% ATP $\gamma$ S) no unwinding reaction was observed. The lifetime of the first stall during  
7 unwinding was  $0.44 \text{ s} \pm 0.01 \text{ s}$ , independent of ATP $\gamma$ S percentage (Fig. 4c), suggesting that  
8 the stall occurs when the enzyme is bound by a well-defined number of ATP $\gamma$ S. If a single  
9 ATP $\gamma$ S molecule is responsible for the hexamer stalling, the fraction of unwinding traces  
10 showing a stall event should depend linearly on the ATP $\gamma$ S concentration whereas a  
11 quadratic dependence is expected if two ATP $\gamma$ S molecules are necessary to stall the  
12 enzyme and so on. The stalled fraction increased linearly between 0.125% and 1% ATP $\gamma$ S  
13 (Fig. 4d, Figure 3 – Figure Supplement 1 and Methods), indicating that the stall is caused  
14 by a single ATP $\gamma$ S. A random ATP hydrolysis mechanism as observed for ClpX, a AAA+  
15 protein unfolding machine (Martin et al., 2005), can thus be excluded for G40P. The model  
16 of a concerted ATP hydrolysis is very unlikely to apply to G40P considering the following  
17 results of our experiments: (i) The unwinding rate  $k_{\text{unw}}$  versus ATP relation followed the  
18 Michaelis-Menten relation with a Hill coefficient close to 1, indicating that per enzymatic  
19 cycle only one ATP has to bind the enzyme (see Methods). (ii) Our slippage data indicate  
20 that an ATP or ADP free helicase loses grip to the tracking strand and slips backward. A  
21 concerted ATP hydrolysis leads to an ATP/ADP free helicase and an elevated probability  
22 to slip backwards at every unwound bp, which would be highly inefficient. Sequential  
23 nucleotide hydrolysis during ssNA translocation by hexameric helicases is also well  
24 supported by structural analysis (Enemark and Joshua-Tor, 2006; Thomsen and Berger,  
25 2009) and was also observed in translocation experiments with T7gp4 (Crampton et al.,  
26 2006). A recent optical tweezers study on T7gp4 proposed a sequential nucleotide  
27 hydrolysis after analyzing the slippage probability at various nucleotide conditions (Sun et  
28 al., 2011). Here we show the first direct evidence for sequential hydrolysis during DNA  
29 unwinding.

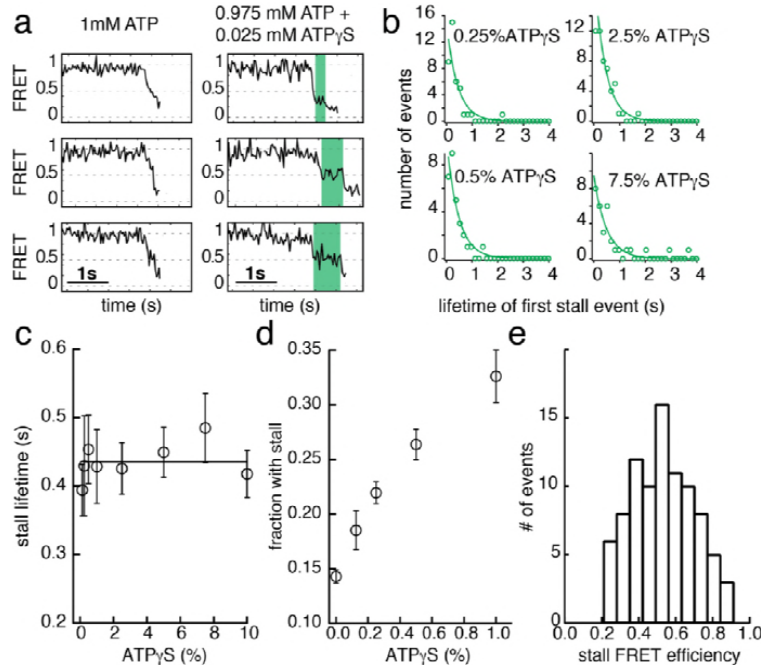

1

2 **Figure 4: ATP $\gamma$ S poisoning of G40P unwinding reactions reveals sequential ATP hydrolysis.** a) Typical  
 3 FRET efficiency traces at [ATP]=1mM in the left panel and [ATP]+[ATP $\gamma$ S] = 0.975mM + 0.025mM in the  
 4 right panel. The unwinding traces with 2.5% ATP $\gamma$ S show a clear stalling event (highlighted in green) that is  
 5 absent at 0% ATP $\gamma$ S. b) Lifetime distribution of the first stall during unwinding at several ATP $\gamma$ S  
 6 percentages. A single exponential fit is used to evaluate the characteristic lifetime. c) The stall lifetime  
 7 evaluated from single exponential fits as a function of ATP $\gamma$ S poisoning percentage. Within error the  
 8 characteristic lifetime is independent of ATP $\gamma$ S concentration. The linear fit is to guide the eye. d) Fraction  
 9 of unwinding traces with a stall event during FRET decrease between 0% and 1% ATP $\gamma$ S. A linear increase  
 10 is expected if a single ATP $\gamma$ S binding event stalls the helicase. e) Stall FRET efficiency distribution of ATP $\gamma$ S  
 11 induced stalls.

12

13

## 14 **How translocation leads to unwinding**

15 Combining our data with the strand exclusion model of unwinding (Ahnert and  
 16 Patel, 1997) and the staircase model of ssDNA translocation (Enemark and Joshua-Tor,  
 17 2006) we propose the following unwinding model for G40P that is likely to apply to other  
 18 hexameric helicases. In the ATP and ADP bound state, G40P has a high affinity to the  
 19 tracking strand. After ADP is released from one subunit the affinity of a central DNA-  
 20 binding loop to the DNA backbone is reduced (Fig. 5a) (Enemark and Joshua-Tor, 2006;  
 21 Thomsen and Berger, 2009). This loop then moves and contacts the backbone phosphate

1 of the next base pair to be unwound when an ATP binds to the subunit. If the next base pair  
2 is an AT base pair, it melts rapidly and the relief of the structural distortion within the  
3 enzyme catapults the protein forward by one base pair. Subsequent ATP hydrolysis and  
4 ADP release repeats this scenario and the helicase steps in 1 bp/nt increments forward.  
5 However, in the case of a GC base pair, the melting step may be significantly slower,  
6 preventing a second DNA-binding loop from contacting the next base pair to be unwound  
7 because of steric constraints within the narrow central channel (Fig. 5b). Here, two  
8 alternative outcomes may be possible: (i) the helicase can move forward after slow melting  
9 of the GC base pair (step 3 top) or (ii) the other subunits of the helicase undergo ATP  
10 hydrolysis and product release, thereby losing contact with the tracking strand such that  
11 the helicase slips backwards and the DNA reziips until a new set of contacts is established  
12 to the tracking strand (step 3 bottom). For other helicases with wider central channels, the  
13 helicase may continue to step forward on the tracking strand without having to wait for  
14 duplex melting and may lead to unwinding of multiple base pairs in a burst after several nt  
15 translocation as has been proposed for a non-hexameric helicase (Myong et al., 2007).

16 At low ATP concentrations, the unbound DNA-binding loop moves forward to the  
17 next binding site. However, due to reduced ATP occupancy for this subunit, the loop would  
18 have difficulty in binding the next backbone position (Fig. 5c). Further ATP hydrolysis in  
19 the remaining subunits may lead to a situation of all DNA-binding loops being detached  
20 from the tracking strand. In this case, the helicase slips backwards and the DNA reziips  
21 again to its original conformation. DnaG has to interact tightly with single-stranded DNA  
22 in order to synthesize primers for the lagging strand. Such interactions would hinder  
23 slippage of G40P, promoting unwinding activity (Fig. 5d), maybe even by an induced  
24 conformational change in the helicase. In the case of ATP $\gamma$ S poisoning, G40P showed long  
25 stalling events. In such a case, a DNA-binding loop of the subunit bound by ATP $\gamma$ S cannot  
26 detach from the tracking strand due to the high affinity induced by the bound ATP $\gamma$ S (Fig.  
27 5e). Thus, the helicase remains at the same position until ATP $\gamma$ S is released from the  
28 subunit.

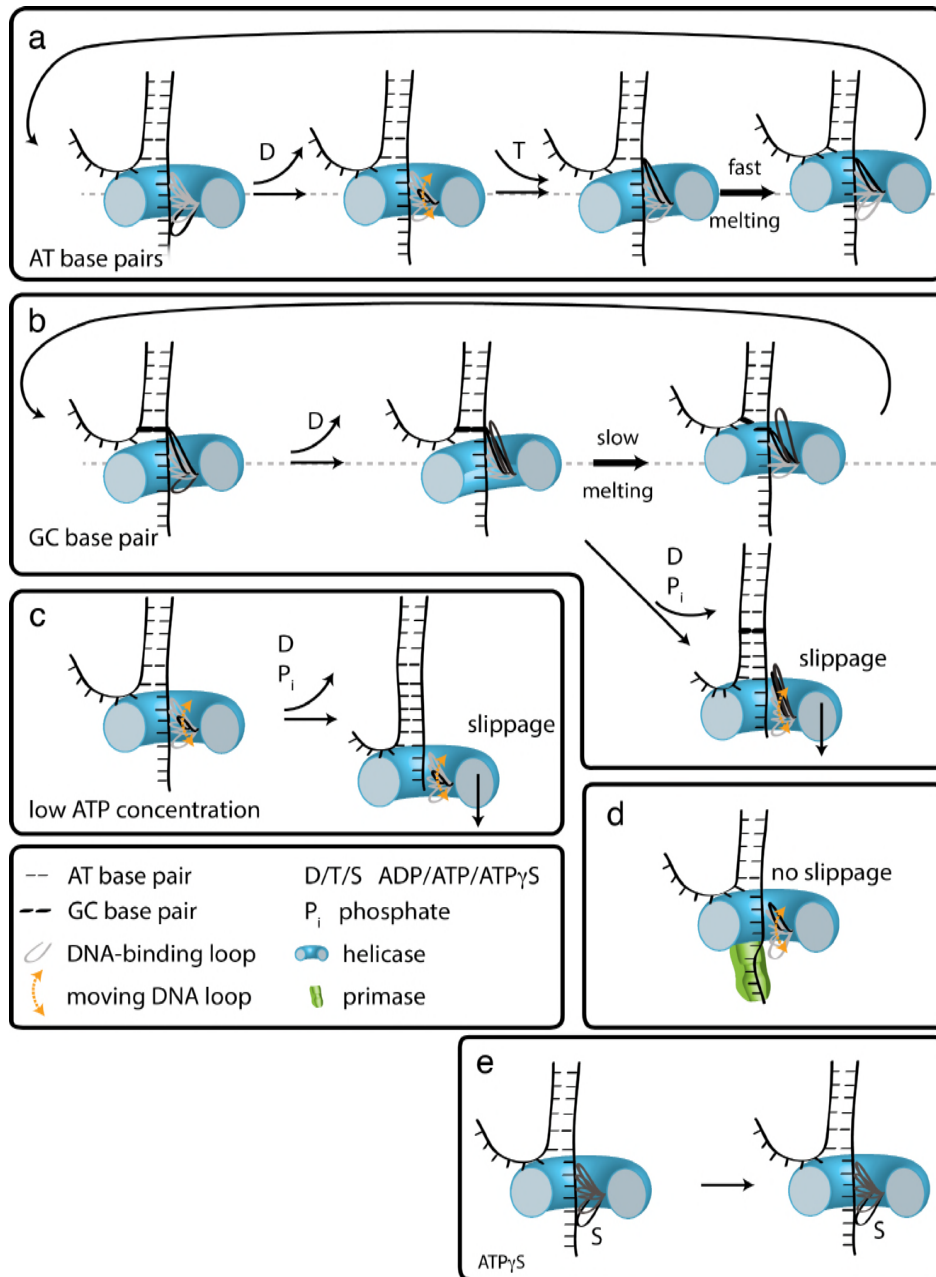

1

2 **Figure 5: How translocation leads to unwinding.** Schematic illustrations of dsDNA unwinding by G40P  
 3 of AT base pairs **(a)**, at a GC base pair induced break **(b)**, at sub-saturating ATP concentrations **(c)**, in  
 4 complex with the primase DnaG **(d)**, and in case of ATP $\gamma$ S induced breaks **(e)**. For detailed description see  
 5 text.

6

## 1 **Materials and Methods**

### 2 **Single-molecule FRET experiments and data analysis.**

3 Single-molecule FRET experiments were performed on a custom-built fluorescence  
4 microscopy setup and recorded with an EMCCD camera (Andor) with a time resolution of  
5 30-100ms using custom C++ software. Single-molecule fluorescence traces were extracted  
6 by means of a custom IDL software.

7 Biotin was attached at the 5' end of the DNA strand during DNA synthesis (Integrated  
8 DNA technologies). Cy3 N-hydroxysuccinimido (NHS) ester and Cy5 NHS ester (GE  
9 Healthcare) were internally labeled to the dT of single-stranded DNA strands by means of  
10 a C6 amino linker (modified by Integrated DNA Technologies, Inc.). A detailed list of all  
11 DNA strands used can be found in Table S4. A quartz microscope slide (Finkenbeiner) and  
12 coverslip were coated with polyethylene glycol (m-PEG-5000; Laysan Bio Inc.) and  
13 biotinylated PEG (biotin-PEG-5000; Laysan Bio Inc.) (Ha, 2001). Measurements were  
14 performed in a flow chamber that was assembled as follows. After the assembly of the  
15 coverslip and quartz slide, a syringe was attached to an outlet hole on the quartz slide  
16 through tubing. All the solution exchanges were performed by putting the solutions (100 $\mu$ L)  
17 in a pipette tip and affixing it in the inlet hole, followed by pulling the syringe. The  
18 solutions were added in the following order. Neutravidin (0.2 mg mL<sup>-1</sup>; Pierce) was applied  
19 to the surface and washed away with T50 buffer (10 mM Tris-HCl, pH 8, 50 mM NaCl).  
20 Biotinylated DNA (about 50–100 pM) in T50 buffer was added and washed away with  
21 imaging buffer (20 mM Tris-HCl, pH 8, 50 mM NaCl, 0.1 mg mL<sup>-1</sup> glucose oxidase, 0.02  
22 mg mL<sup>-1</sup> catalase, 0.8% dextrose, in a saturated (~ 3 mM) Trolox solution) (Rasnik et al.,  
23 2006a). For most experiments [ATP]=1mM (except for the ATP titration experiments),  
24 G40P [hexamer]=60nM in imaging buffer was injected to the flow chamber with 10mM  
25 MgCl<sub>2</sub> while recording a fluorescence movie. For DnaG experiments we performed  
26 G40P/DnaG experiments by incubating G40P hexamers together with DnaG in a molar  
27 ratio 1:3, respectively. This mixture was then injected to the flow chamber in imaging  
28 buffer containing 60nM G40P hexamer concentration, 180nM DnaG monomer  
29 concentration, [ATP]=1mM and 10mM MgCl<sub>2</sub>. All experiments were performed at room  
30 temperature T=296 K.



1 FRET efficiency values ( $E_{\text{FRET}}$ ) were calculated as the ratio between the acceptor intensity  
2 and the total (acceptor plus donor) intensity after subtracting the background. Unwinding  
3 initiation times, unwinding times and stall lifetimes were scored by visual inspection of  
4 donor and acceptor intensities (Pandey, 2009). The stall FRET levels were averaged after  
5 visual scoring the stall lifetime of at least 5 data points. The number of slippage events  
6 before successful unwinding was measured by counting the number of crossings of a  
7 threshold  $E_{\text{FRET}} = 0.7 - 0.8$  after box averaging the traces with a time resolution  $t=150\text{ms}$ .  
8 All data were analyzed and plotted with scripts written in MATLAB (Mathworks) and in  
9 Igor Pro (Wavemetrics).

## 10 **DNA substrates**

11 All DNA oligos were purchased from Integrated DNA Technologies (Coralville, IA) and  
12 site-specifically labeled with NHS-Cy3 or NHS-Cy5 obtained from GE Healthcare  
13 (PA13101 and PA15101, respectively; Pittsburg, PA). Table S4 lists all sequences.  
14 \iAmMC6T\ denotes the amine-modified thymine with a C6 spacer used for site-specific  
15 labeling. \5BiosG\ denotes the 5' modification with biotin, \3Bio\ denotes the 3'  
16 modification with biotin and \iCy5\ denotes the internal modification with Cy5  
17 fluorophore.

## 18 **Design of the unwinding substrate**

19 The exclusion model of unwinding for hexameric helicases suggests that the tracking strand  
20 passes through the central pore of the hexameric protein and the non-tracking will be  
21 excluded. Thus, a labeling of the tracking strand might affect the unwinding reaction since  
22 the fluorophore would have to pass through the central channel. We tested this possibility  
23 by comparing average unwinding times of a substrate with labels at the tracking and non-  
24 tracking strand (Figure 1 – Figure Supplement 1a) as well as with labels just at the non-  
25 tracking strand (Figure 1 – Figure Supplement 1b). The average unwinding time of both  
26 substrates at  $[\text{ATP}]=1\text{mM}$  agreed very well within error ( $t_{\text{avg}}(\text{tracking}+\text{non-}$   
27  $\text{tracking})=0.57\pm 0.22\text{s}$  and  $t_{\text{avg}}(\text{double-labeled non-tracking})=0.59\pm 0.21\text{s}$ ). However, the  
28 accessible FRET range in the case of the double-labeled non-tracking strand was  
29 significantly smaller (FRET efficiencies between 0.3 and 0.7, Figure 1 – Figure  
30 Supplement 1b) in contrast to the labeling at both DNA strands (FRET efficiencies between  
31 0.95 and 0.11, Figure 1 – Figure Supplement 1a). A larger FRET efficiency range allows a

1 higher resolution. Combined without detectable hindrance of the fluorophore passing  
2 through the central pore of G40P, further experiments were conducted with the substrate  
3 where both DNA strands labeled (Figure 1 – Figure Supplement 1a).

#### 4 **Unwinding initiation time depends linearly on the protein concentration**

5 Figure 1b and Figure 1 – Figure Supplement 1c show typical unwinding traces after adding  
6 a solution containing G40P and 1 mM ATP at time  $t_{inject}$  to the imaging chamber with  
7 immobilized DNA molecules. Unwinding begins after a delay (FRET starts to decrease as  
8 indicated by a decrease in donor signal and a concomitant increase in acceptor signal),  
9 which we call the unwinding initiation time,  $t_{init}$ . Unwinding itself takes a finite amount of  
10 time,  $t_{unw}$ , during which FRET decreases to the lowest level and the total fluorescence  
11 signal disappears. The average  $t_{init}$  ranged from 6.6 s to 88 s as the protein concentration  
12 (in hexamer) is varied and is much longer than the average  $t_{unw} \approx 0.55$  s at saturating [ATP]  
13 = 3mM. Therefore, unwinding events can be attributed to the action of a single functional  
14 unit of the helicase, which we presume to be a hexamer. The unwinding initiation rate,  
15 defined as the inverse of average  $t_{init}$ , increased linearly with protein concentration (Figure  
16 1 – Figure Supplement 1d). In contrast, the average  $t_{unw}$  did not show a significant  
17 dependence on protein concentration (inset Figure 1 – Figure Supplement 1d). The linear  
18 relation between the protein concentration and the initiation rate indicates that G40P is  
19 loaded as a preassembled hexamer instead of being assembled on the DNA *in situ*. Further  
20 support for the hexamer loading is provided by additional experiments blocking the free  
21 ssDNA end of the forked DNA with anti-digoxigenin (sketch in Figure 1 – Figure  
22 Supplement 1e). At [ATP] = 1mM and [G40P<sub>6</sub>] = 60nM, the percentage of single-molecule  
23 FRET traces that show unwinding events was reduced from 42% to 4.7% after incubation  
24 of the digoxigenin modified DNA construct with [anti-digoxigenin]=0.1mg/mL followed  
25 by washing out of unbound anti-digoxigenin (Figure 1 – Figure Supplement 1e).

#### 26 **ATP titration with ADP as competitive inhibitor**

27 As expected, lowering the ATP concentration, from 3 mM to 75  $\mu$ M, significantly  
28 increased  $t_{unw}$  (Figure 1 – Figure Supplement 1f, [hexamer]=60 nM). The unwinding rate  
29  $k_{unw}$ , defined as the inverse of average  $t_{unw}$ , vs. ATP concentration (red squares Figure 1 –  
30 Figure Supplement 1h) curve could be well-fitted using the Michaelis-Menten equation,  
31 yielding an apparent Michaelis-Menten constant  $K_m = 87 \pm 9 \mu$ M and a maximum

1 unwinding rate  $k_{\text{unw}} = 1.91 \pm 0.05 \text{ s}^{-1}$ . Including ADP in the reaction increased the apparent  
2  $K_m$  to  $191 \pm 14 \mu\text{M}$  and  $272 \pm 36 \mu\text{M}$  at 0.5 mM and 1 mM ADP, respectively (Figure 1 –  
3 Figure Supplement 1g and h) with little change in the maximum unwinding rate  
4  $k_{\text{unw}}([\text{ADP}]=0.5\text{mM}) = 2.01 \pm 0.04 \text{ s}^{-1}$  and  $k_{\text{unw}}([\text{ADP}]=1\text{mM}) = 1.91 \pm 0.07 \text{ s}^{-1}$ . A fit to the  
5 more general Hill-equation to the ATP titration results in a Hill coefficient  $n=1.2 \pm 0.2$   
6 (dashed line in Figure 1 – Figure Supplement 1h). A Hill coefficient of 1 implies that either  
7 each identical subunit can bind ATP and hydrolyze completely independent of each other  
8 (no binding cooperativity between the subunits) or that for every step one or more subunits  
9 can bind ATP successively and in coordination but not cooperatively (Schnitzer and Block,  
10 1997). It is important to note that a Hill coefficient of 1 does not imply that only one ATP  
11 is bound per enzymatic cycle, but that binding of one ATP neither facilitates nor hinders  
12 binding of more ATP.

### 13 **FRET calibration**

14 FRET vs number of unwound base pairs was calibrated with the substrates 4AT4GC,  
15 7AT33GC, 10AT30GC and 13AT27GC (Figure 1 – Figure Supplement 2c). All substrates  
16 allowed G40P only partial unwinding, e.g. the AT base pairs were unwound, followed by  
17 a stall at the GC base pairs. The stalling FRET level was determined through averaging  
18 over at least 5 data points at stalling events during an unwinding attempt (Figure 1 – Figure  
19 Supplement 2e through h). The FRET level distributions (Figure 1 – Figure Supplement  
20 2d) were fitted with Gaussian distributions, yielding a FRET level of  $E_{\text{FRET}}(4\text{AT}) = 0.73 \pm$   
21  $0.05 (\pm \sigma)$ ,  $E_{\text{FRET}}(7\text{AT}) = 0.61 \pm 0.05$ ,  $E_{\text{FRET}}(10\text{AT}) = 0.48 \pm 0.04$ ,  $E_{\text{FRET}}(13\text{AT}) = 0.24 \pm$   
22  $0.04$  and a donor leakage of  $E_{\text{FRET}}(\text{leakage}) = 0.11 \pm 0.02$ . The GC base pair induced peaks  
23 fall within error on our intrinsic calibration (Figure 1 – Figure Supplement 2e) leading to  
24 the conclusion that G40P unwinds dsDNA in one base pair step size. Figure 1 – Figure  
25 Supplements 2e through h show example traces with 4AT, 7AT, 10AT and 13AT bp,  
26 respectively, followed by a GC bp stretch.

### 27 **G40P ATPase activity and ATP and ATP $\gamma$ S affinity**

28 ATPase activity of G40P was tested using EnzChek Phosphate Assay Kit (Invitrogen). The  
29 solution conditions were 20mM Tris-HCl, 50mM NaCl and either 10mM MgCl<sub>2</sub> or 10mM  
30 MnCl<sub>2</sub> and 1mM ATP. G40P showed without ssDNA a significant ATPase activity that  
31 could be increased after addition of ssDNA (Figure 3 – Figure Supplement 1a). This

1 ATPase activity without ssDNA was suppressed with  $MnCl_2$  (Figure 3 – Figure  
2 Supplement 1b).

3 ATP and ATP $\gamma$ S affinity was determined using competitive titration as previously  
4 described by (Aregger and Klostermeier, 2009). We preformed complexes of G40P and  
5 Mant-ADP (Invitrogen) in 1:1 molar ratio (1 $\mu$ M G40P hexamer, 1 $\mu$ M mant-ADP). The  
6 final buffer conditions for the competitive titration was: 20mM Tris-HCl pH 8, 50mM  
7 NaCl, 10mM  $MnCl_2$ . Mant-ADP was excited at  $360 \pm 5$  nm, Mant emission was observed  
8 at  $440 \pm 5$ nm using Varian Cary Eclipse Fluorescence Spectrophotometer. The data was  
9 averaged over 5 seconds and 5 data points were taken and averaged. Addition of both, ATP  
10 or ATP $\gamma$ S, decreased the emission intensity indicating a competitive displacement of the  
11 prebound mant-ADP from G40P. The data was evaluated using a solution for a quadratic  
12 equation describing complex formation (Karow et al., 2007; Thrall et al., 1996) (Figure 3  
13 – Figure Supplement 1c):

$$14 \quad F = F_0 + \frac{\Delta F_{\max}}{[L_{\text{tot}}]} \cdot \left( \frac{[E_{\text{tot}}] + [L_{\text{tot}}] + K_D}{2} - \sqrt{\left( \frac{[E_{\text{tot}}] + [L_{\text{tot}}] + K_D}{2} \right)^2 - [E_{\text{tot}}][L_{\text{tot}}]} \right), \quad (1)$$

15 where  $F_0$  denotes the unbound mant fluorescence,  $\Delta F_{\max}$  is the fluorescence amplitude,  
16  $[E_{\text{tot}}]$  the total enzyme concentration and  $[L_{\text{tot}}]$  the total ligand concentration and  $K_D$  the  
17 apparent dissociation constant. Both ligands showed similar affinity (ATP $\gamma$ S  $K_D = 1.4 \pm 0.9$   
18  $\mu$ M, ATP  $K_D = 3.5 \pm 0.8$   $\mu$ M).

19 **Protein preparation.** G40P and DnaG were expressed and purified as described  
20 previously (Wang et al., 2008).

21

22

### 23 **Figure Supplement Legends:**

24

25 **Figure 1 – Figure Supplement 1. a)** Opposite fluorophore attachment to the forked  
26 dsDNA substrate yield a wide FRET change range during unwinding. A typical trace is  
27 shown on the right-hand side. **b)** Labeling the non-tracking strand with the donor and  
28 acceptor fluorophores relies for the FRET efficiency change on the shorter persistence  
29 length of ssDNA compared to dsDNA. Both fluorophores do not have to pass through the

1 central pore of the helicase and yield identical average unwinding times. However, the  
2 FRET efficiency change signal is much less clear (right). **c)** Selection criteria for traces to  
3 be included in the analysis. Typical unwinding trace of G40P. At  $t_{\text{inject}}$  the protein solution  
4 together with Mg.ATP is injected. The unwinding initiation time  $t_{\text{init}}$  depends on the protein  
5 concentration and is measured from the moment of protein solution injection until  
6 unwinding starts. smFRET traces were tested for acceptor survival by means of direct  
7 excitation with a 633 nm laser to exclude acceptor bleaching events from analysis. During  
8 the unwinding assay, only donor molecules were excited with a 532 nm laser. In the  
9 illustrated trace, unwinding was observed at  $t \approx 22$  s, the acceptor test was performed at  $t$   
10  $\approx 96$ -97.5 s. **d)** The unwinding initiation rate ( $1/t_{\text{init}}$ ) is shown as a function of G40P  
11 hexamer concentration and can be fitted linearly (errors are standard deviation). Inset: The  
12 unwinding time is independent of the protein concentration within error. **e)** Percentage of  
13 initial high FRET traces with successful unwinding events without anti-digoxigenin and  
14 with anti-digoxigenin at the 5' tail of the forked duplex. Inset: Schematic illustration of the  
15 digoxigenin-modified substrate (square at the 5' tail) blocked by anti-digoxigenin (yellow).  
16 **f)** Typical FRET efficiency unwinding traces at [ATP] = 3 mM, 1 mM, 250  $\mu$ M, 150  $\mu$ M,  
17 100  $\mu$ M and 75  $\mu$ M. The unwinding appears smooth and the unwinding time increased with  
18 decreasing ATP concentration. **g)** Typical FRET efficiency traces at [ATP]=250  $\mu$ M and  
19 with increasing [ADP]= 0 mM, 0.5 mM and 1 mM. The effect of ADP as competitive  
20 inhibitor can be directly observed with increasing unwinding times. **h)** Semi-logarithmic  
21 plot of the average unwinding rate ( $1/t_{\text{unw}}$ ) as a function of ATP concentration (errors are  
22 standard deviation). The average unwinding rate at different ATP concentrations was  
23 determined without ADP (red squares), with 0.5 mM ADP (green circles), with 1 mM ADP  
24 (blue triangles) and 5 mM  $P_i$  (black rhomboids). The solid lines are fits to the data using  
25 Michaelis-Menten equation. The red dashed is a fit to the 0mM ADP data with the more  
26 general Hill-equation.

27

28 **Figure 1 – Figure Supplement 2. a)** Stall lifetime distribution of G40P stalls on the 1GC  
29 substrate. A single exponential fit yields a characteristic lifetime of  $79 \pm 5$ ms. **b)** Fraction  
30 of all traces with protein activity with complete unwinding (green) and just unwinding  
31 attempts (red) on different substrates (AT, 1GC, 2GC, 3GC) and at 21°C and 33°C,

1 respectively. **c)** Sketch of the intrinsic calibration constructs with  $x$  AT base pairs followed  
2 by  $40-x$  GC base pairs. Due to its exquisite sequence sensitivity G40P stalls at the GC base  
3 pairs. **d)** Stall FRET level histograms for 4 different substrates: 4AT, 7AT, 10AT and  
4 13AT. The Histograms were evaluated with Gaussian fits. The leakage of donor  
5 fluorescence to the acceptor channel was determined to give an apparent  $E_{\text{FRET}}=0.11\pm 0.02$ .  
6 **e) through h)** Sample traces of calibration substrates 4AT, 7AT, 10AT and 13AT,  
7 respectively, with the analyzed stall level indicated by arrows.

8

9 **Figure 3 – Figure Supplement 3. a)** ATPase activity of G40P tested with EnzChek  
10 Phosphate detection kit (Invitrogen). After addition of ATP and depletion of free  
11 phosphates, G40P was added to the solution (20mM Tris-HCl, 50mM NaCl, 10mM  
12  $\text{MgCl}_2$ ). We observed without any ssDNA present in solution a significant ATPase activity.  
13 Addition of ssDNA to the solution increased the ATPase activity of G40P by a factor of  
14 two. **b)** The ATPase activity of G40P without ssDNA was successfully suppressed by  
15 exchanging  $\text{MgCl}_2$  to  $\text{MnCl}_2$ . After addition of ssDNA, G40P showed approximately 50%  
16 of the ATPase activity as in case (a). **c)** Normalized fluorescence as function of the  
17 competitor. Preformed mant-ADP G40P complexes were titrated with ATP (green circles)  
18 and  $\text{ATP}\gamma\text{S}$  (red circles). In both cases the fluorescence signal decreased rapidly. The data  
19 was evaluated using eq 1. **d)** Stall lifetime of non- $\text{ATP}\gamma\text{S}$  induced stalling events at  
20 saturating ATP conditions. The typical lifetime was determined to be  $t_0 = 0.05 \pm 0.01\text{s}$ ,  
21 significantly shorter than  $\text{ATP}\gamma\text{S}$  induced stalls with  $t \approx 0.44\text{s}$ . **e)** Fraction of unwinding  
22 traces with a stall event during FRET decrease between 0% and 10%  $\text{ATP}\gamma\text{S}$ . A linear  
23 increase is expected if a single  $\text{ATP}\gamma\text{S}$  binding event stalls the helicase. At higher  $\text{ATP}\gamma\text{S}$   
24 concentrations the fraction of traces with a stalling event saturate. **f)** Average unwinding  
25 rate of G40P of the AT substrate as a function of  $\text{ATP}\gamma\text{S}$  fraction (total nucleotide  
26 concentration was 1mM,  $\text{ATP}\gamma\text{S}$  concentration was increased from 0 to 100 $\mu\text{M}$ ).

27

28 **Acknowledgements.** The authors thank Benjamin Leslie, Jaya Yodh, Prakrit Jena, Salman  
29 Syed, Jeehae Park, Sinan Arslan and Hannah Gelman for discussion. M.S. gratefully  
30 acknowledges his postdoctoral fellowship by German Research Foundation (DFG  
31 SCHL1896/1-1) and support by the German Ministry for Science and Education (BMBF



1 03Z2EN11). This work was supported by NIH grant GM065367 (to T.H.) and 137405 (to  
2 X.S.C.) and by NSF grant PHY-082261 (to T.H.).

3 **Author contributions.** M.S., X.S.C. and T.H. designed the research. G.W. expressed and  
4 purified the protein. M.S. performed the single-molecule experiments. M.S., G.W., X.S.C.  
5 and T.H. discussed the data. M.S. and T.H. analyzed the data and wrote the manuscript.

6 **Competing interest.** The authors declare no conflict of interest.

7

## 8 **References**

- 9 Adelman JL, Jeong Y-J, Liao J-C, Patel G, Kim D-E, Oster G, Patel SS. 2006.  
10 Mechanochemistry of transcription termination factor Rho. *Mol Cell* **22**:611–621.
- 11 Ahnert P, Patel SS. 1997. Asymmetric interactions of hexameric bacteriophage T7 DNA  
12 helicase with the 5'- and 3'-tails of the forked DNA substrate. *J Biol Chem*  
13 **272**:32267–32273.
- 14 Aregger R, Klostermeier D. 2009. The DEAD box helicase YxiN maintains a closed  
15 conformation during ATP hydrolysis. *Biochemistry* **48**:10679–10681.
- 16 Berger JM. 2008. SnapShot: nucleic acid helicases and translocases. *Cell* **134**:888–  
17 888.e1.
- 18 Bird LE, Pan H, Soultanas P, Wigley DB. 2000. Mapping protein-protein interactions  
19 within a stable complex of DNA primase and DnaB helicase from *Bacillus*  
20 *stearothermophilus*. *Biochemistry* **39**:171–82. doi:10.1021/bi9918801
- 21 Cheng W, Arunajadai SG, Moffitt JR, Tinoco I, Bustamante CJ. 2011. Single-base pair  
22 unwinding and asynchronous RNA release by the hepatitis C virus NS3 helicase.  
23 *Science* **333**:1746–9. doi:10.1126/science.1206023
- 24 Crampton DJ, Mukherjee S, Richardson CC. 2006. DNA-induced switch from  
25 independent to sequential dTTP hydrolysis in the bacteriophage T7 DNA helicase.  
26 *Mol Cell* **21**:165–174.
- 27 Donmez I, Patel SS. 2008. Coupling of DNA unwinding to nucleotide hydrolysis in a  
28 ring-shaped helicase. *EMBO J* **27**:1718–1726.
- 29 Enemark EJ, Joshua-Tor L. 2008. On helicases and other motor proteins. *Curr Opin*  
30 *Struct Biol* **18**:243–257.
- 31 Enemark EJ, Joshua-Tor L. 2006. Mechanism of DNA translocation in a replicative  
32 hexameric helicase. *Nature* **442**:270–275.
- 33 Erzberger JP, Berger JM. 2006. Evolutionary relationships and structural mechanisms of  
34 AAA+ proteins. *Annu Rev Biophys Biomol Struct* **35**:93–114.  
35 doi:10.1146/annurev.biophys.35.040405.101933
- 36 Gai D, Zhao R, Li D, Finkielstein C V, Chen XS. 2004. Mechanisms of conformational  
37 change for a replicative hexameric helicase of SV40 large tumor antigen. *Cell*

- 1           **119**:47–60.
- 2     Galletto R, Jezewska MJ, Bujalowski W. 2004. Unzipping mechanism of the double-  
3       stranded DNA unwinding by a hexameric helicase: quantitative analysis of the rate  
4       of the dsDNA unwinding, processivity and kinetic step-size of the Escherichia coli  
5       DnaB helicase using rapid quench-flow method. *J Mol Biol* **343**:83–99.
- 6     Ha T. 2001. Single-molecule fluorescence resonance energy transfer. *Methods* **25**:78–86.  
7       doi:10.1006/meth.2001.1217
- 8     Ha T, Enderle T, Ogletree DF, Chemla DS, Selvin PR, Weiss S. 1996. Probing the  
9       interaction between two single molecules: fluorescence resonance energy transfer  
10      between a single donor and a single acceptor. *Proc Natl Acad Sci U S A* **93**:6264–  
11      6268.
- 12    Ha T, Rasnik I, Cheng W, Babcock HP, Gauss GH, Lohman TM, Chu S. 2002. Initiation  
13      and re-initiation of DNA unwinding by the Escherichia coli Rep helicase. *Nature*  
14      **419**:638–641. doi:10.1038/nature01083
- 15    Hingorani MM, Patel SS. 1993. Interactions of bacteriophage T7 DNA primase/helicase  
16      protein with single-stranded and double-stranded DNAs. *Biochemistry* **32**:12478–  
17      12487.
- 18    Itsathitphaisarn O, Wing RA, Eliason WK, Wang J, Steitz TA. 2012. The hexameric  
19      helicase DnaB adopts a nonplanar conformation during translocation. *Cell* **151**:267–  
20      277.
- 21    Johnson DS, Bai L, Smith BY, Patel SS, Wang MD. 2007. Single-molecule studies reveal  
22      dynamics of DNA unwinding by the ring-shaped T7 helicase. *Cell* **129**:1299–1309.
- 23    Karow AR, Theissen B, Klostermeier D. 2007. Authentic interdomain communication in  
24      an RNA helicase reconstituted by expressed protein ligation of two helicase  
25      domains. *FEBS J* **274**:463–473.
- 26    Liao J-C, Jeong Y-J, Kim D-E, Patel SS, Oster G. 2005. Mechanochemistry of t7 DNA  
27      helicase. *J Mol Biol* **350**:452–475.
- 28    Lionnet T, Spiering MM, Benkovic SJ, Bensimon D, Croquette V. 2007. Real-time  
29      observation of bacteriophage T4 gp41 helicase reveals an unwinding mechanism.  
30      *Proc Natl Acad Sci U S A* **104**:19790–19795.
- 31    Lohman TM, Tomko EJ, Wu CG. 2008. Non-hexameric DNA helicases and translocases:  
32      mechanisms and regulation. *Nat Rev Mol Cell Biol* **9**:391–401.
- 33    Manosas M, Spiering MM, Zhuang Z, Benkovic SJ, Croquette V. 2009. Coupling DNA  
34      unwinding activity with primer synthesis in the bacteriophage T4 primosome. *Nat*  
35      *Chem Biol* **5**:904–912.
- 36    Martin A, Baker TA, Sauer RT. 2005. Rebuilt AAA + motors reveal operating principles  
37      for ATP-fuelled machines. *Nature* **437**:1115–1120.
- 38    Moffitt JR, Chemla YR, Aathavan K, Grimes S, Jardine PJ, Anderson DL, Bustamante  
39      CJ. 2009. Intersubunit coordination in a homomeric ring ATPase. *Nature* **457**:446–  
40      450.

- 1 Myong S, Bruno MM, Pyle AM, Ha T. 2007. Spring-loaded mechanism of DNA  
2 unwinding by hepatitis C virus NS3 helicase. *Science* **317**:513–6.  
3 doi:10.1126/science.1144130
- 4 Pandey M, Syed S, Donmez I, Patel G, Ha T, Patel SS. 2009. Coordinating DNA  
5 replication by means of priming loop and differential synthesis rate. *Nature*  
6 **462**:940–943.
- 7 Patel SS, Picha KM. 2000. Structure and function of hexameric helicases. *Annu Rev*  
8 *Biochem* **69**:651–697.
- 9 Pedré X, Weise F, Chai S, Lüder G, Alonso JC. 1994. Analysis of cis and trans acting  
10 elements required for the initiation of DNA replication in the Bacillus subtilis  
11 bacteriophage SPP1 **236**:1324–1340.
- 12 Qi Z, Pugh RA, Spies M, Chemla YR. 2013. Sequence-dependent base pair stepping  
13 dynamics in XPD helicase unwinding. *Elife* **2**:e00334. doi:10.7554/eLife.00334
- 14 Rasnik I, McKinney SA, Ha T. 2006a. Nonblinking and long-lasting single-molecule  
15 fluorescence imaging. *Nat Methods* **3**:891–893.
- 16 Rasnik I, Myong S, Ha T. 2006b. Unraveling helicase mechanisms one molecule at a  
17 time. *Nucleic Acids Res* **34**:4225–4231.
- 18 Ribeck N, Kaplan DL, Bruck I, Saleh OA. 2010. DnaB helicase activity is modulated by  
19 DNA geometry and force. *Biophys J* **99**:2170–2179.
- 20 Rothenberg E, Trakselis MA, Bell SD, Ha T. 2007. MCM forked substrate specificity  
21 involves dynamic interaction with the 5'-tail. *J Biol Chem* **282**:34229–34234.
- 22 Roychowdhury A, Szymanski MR, Jezewska MJ, Bujalowski W. 2009. Interactions of  
23 the Escherichia coli DnaB-DnaC protein complex with nucleotide cofactors. 1.  
24 Allosteric conformational transitions of the complex. *Biochemistry* **48**:6712–6729.
- 25 Schnitzer MJ, Block SM. 1997. Kinesin hydrolyses one ATP per 8-nm step. *Nature*  
26 **388**:386–390.
- 27 Schwartz A, Rabhi M, Jacquinet F, Margeat E, Rahmouni AR, Boudvillain M. 2009. A  
28 stepwise 2'-hydroxyl activation mechanism for the bacterial transcription  
29 termination factor Rho helicase. *Nat Struct Mol Biol* **16**:1309–1316.
- 30 Singleton MR, Sawaya MR, Ellenberger T, Wigley DB. 2000. Crystal structure of T7  
31 gene 4 ring helicase indicates a mechanism for sequential hydrolysis of nucleotides.  
32 *Cell* **101**:589–600.
- 33 Stano NM, Jeong Y-J, Donmez I, Tummalapalli P, Levin MK, Patel SS. 2005. DNA  
34 synthesis provides the driving force to accelerate DNA unwinding by a helicase.  
35 *Nature* **435**:370–373.
- 36 Sun B, Johnson DS, Patel G, Smith BY, Pandey M, Patel SS, Wang MD. 2011. ATP-  
37 induced helicase slippage reveals highly coordinated subunits. *Nature* **478**:132–135.
- 38 Syed S, Pandey M, Patel SS, Ha T. 2014. Single-molecule fluorescence reveals the  
39 unwinding stepping mechanism of replicative helicase. *Cell Rep* **6**:1045.
- 40 Thomsen ND, Berger JM. 2009. Running in reverse: the structural basis for translocation

- 1           polarity in hexameric helicases. *Cell* **139**:523–534.
- 2   Thrall SH, Reinstein J, Wöhrl BM, Goody RS. 1996. Evaluation of human  
3       immunodeficiency virus type 1 reverse transcriptase primer tRNA binding by  
4       fluorescence spectroscopy: specificity and comparison to primer/template binding.  
5       *Biochemistry* **35**:4609–4618.
- 6   Wang G, Klein MG, Tokonzaba E, Zhang Y, Holden LG, Chen XS. 2008. The structure  
7       of a DnaB-family replicative helicase and its interactions with primase. *Nat Struct*  
8       *Mol Biol* **15**:94–100. doi:10.1038/nsmb1356
- 9   Yodh JG, Schlierf M, Ha T. 2010. Insight into helicase mechanism and function revealed  
10       through single-molecule approaches. *Q Rev Biophys* **43**:185–217.  
11       doi:10.1017/S0033583510000107
- 12   Yodh JG, Stevens BC, Kanagaraj R, Janscak P, Ha T. 2009. BLM helicase measures  
13       DNA unwind before switching strands and hRPA promotes unwinding reinitiation.  
14       *EMBO J* **28**:405–416.
- 15
